# Supplementary material
Source: MDPI journal article supplement (https://www.mdpi.com/1999-4907/14/4/661)
Supplement: s1 [file s1]

**Table S1.** Allometric regression equations and summary statistics.

| DBH-class    | Equations                       | Adjusted R <sup>2</sup> | Standard error of the mean | R. error (%) |
|--------------|---------------------------------|-------------------------|----------------------------|--------------|
| DBH≤5 cm     | WT=0.05549×D <sup>2.87776</sup> | 0.91164                 | 0.60826                    | -0.23        |
|              | WB=0.01124×D <sup>3.16237</sup> | 0.81933                 | 0.30284                    | 0.00         |
|              | WL=0.01551×D <sup>2.32693</sup> | 0.86555                 | 0.08602                    | 0.42         |
|              | WR=0.02838×D <sup>2.65348</sup> | 0.90495                 | 0.22077                    | -0.27        |
| 5<DBH≤10 cm  | WT=0.11701×D <sup>2.36933</sup> | 0.88428                 | 2.05700                    | 0.04         |
|              | WB=0.01621×D <sup>2.93859</sup> | 0.76490                 | 1.79321                    | 0.63         |
|              | WL=0.04169×D <sup>1.90082</sup> | 0.68922                 | 0.44047                    | 0.39         |
|              | WR=0.04977×D <sup>2.19517</sup> | 0.95730                 | 0.32819                    | -0.16        |
| 10<DBH≤20 cm | WT=0.10769×D <sup>2.34891</sup> | 0.77761                 | 4.15734                    | 4.55         |
|              | WB=0.00385×D <sup>3.15093</sup> | 0.88184                 | 3.81171                    | 3.69         |
|              | WL=0.00372×D <sup>2.65113</sup> | 0.82848                 | 0.96151                    | 0.57         |
|              | WR=0.03538×D <sup>2.29567</sup> | 0.81687                 | 3.46518                    | 0.45         |
| DBH>20 cm    | WT=0.03541×D <sup>2.65146</sup> | 0.97844                 | 36.71034                   | -2.34        |
|              | WB=0.00583×D <sup>2.94383</sup> | 0.85965                 | 52.85291                   | -1.61        |
|              | WL=0.07709×D <sup>1.55399</sup> | 0.71000                 | 4.94167                    | -0.30        |
|              | WR=0.01128×D <sup>2.67850</sup> | 0.92962                 | 24.5010                    | -1.11        |

WT=weight of trunk, WB=weight of branch, WL=weight of leaf, WR=weight of root
